# Supplementary material
Source: PubMed Central journal article supplement (PMC4395461)
Supplement: NIHMS677096-supplement-SupplFigures.pdf [file NIHMS677096-supplement-SupplFigures.pdf]

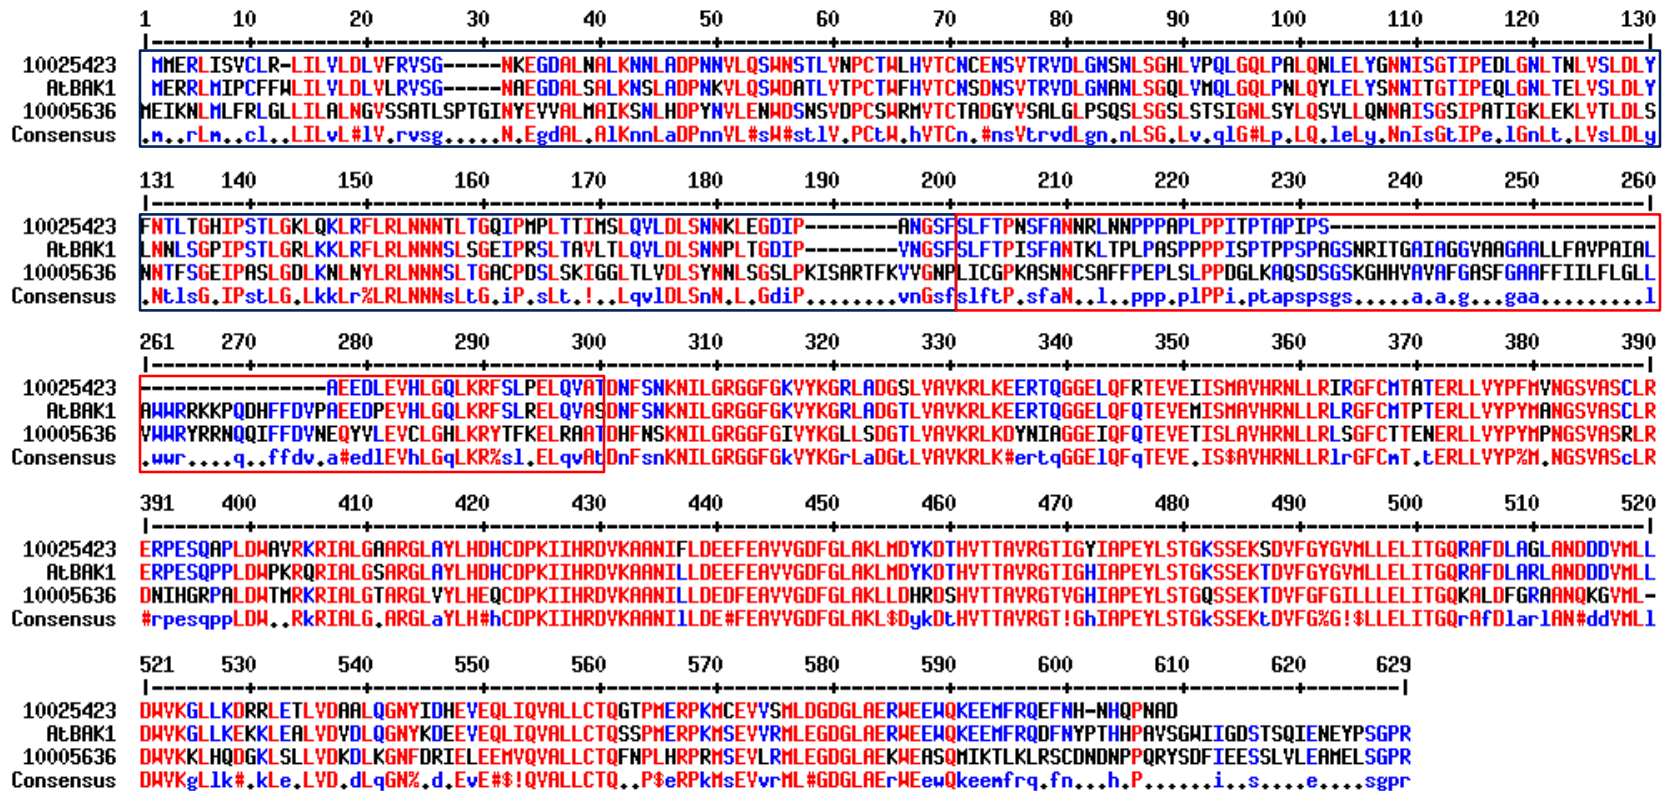

**Figure S1. Sequence alignment of *Arabidopsis* AtBAK1 with *G. raimondii* SERK 10025423 and 10005636.** The amino acid sequences were used for the alignment. The sequences squared in blue are LRR domain and the sequences squared in red conserved are transmembrane and juxtamembrane domains. The alignment was performed using Multalin website (<http://multalin.toulouse.inra.fr/multalin/>) with a hierarchical clustering approach.
